# Supplementary material
Source: PubMed Central journal article supplement (PMC3418917)

**A**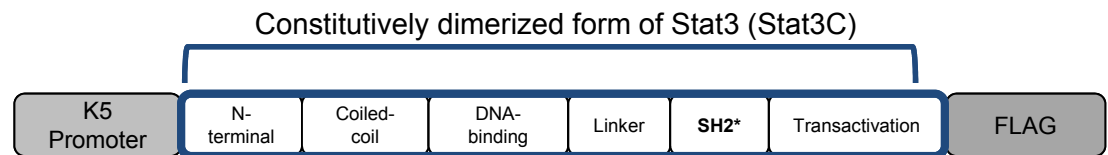**B**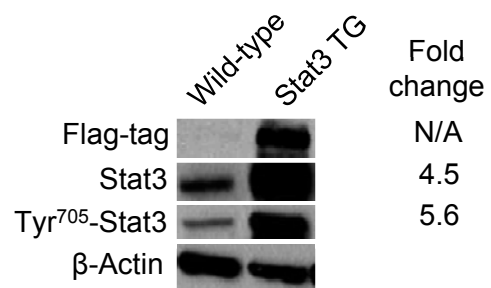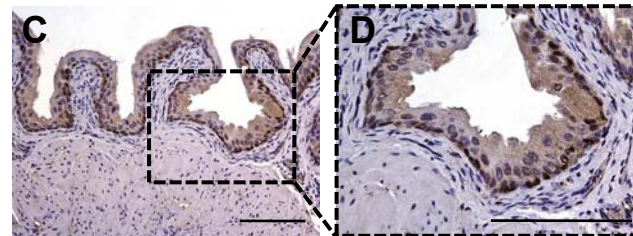**E**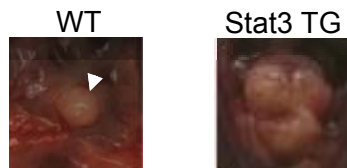**F**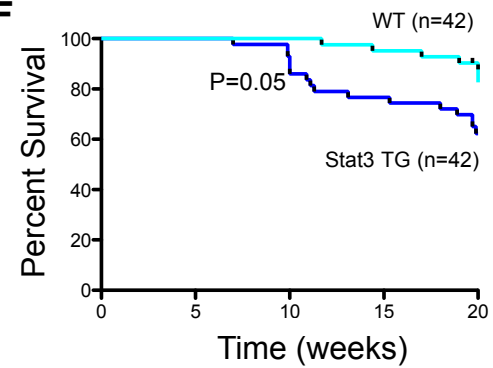

Supplement: NIHMS375279-supplement-1.pdf [file NIHMS375279-supplement-1.pdf]

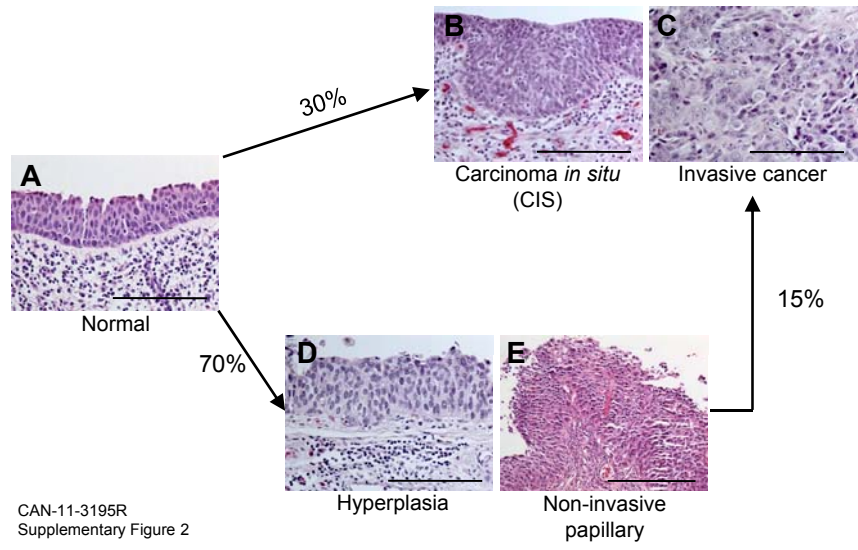

CAN-11-3195R  
Supplementary Figure 2

Supplement: NIHMS375279-supplement-2.pdf [file NIHMS375279-supplement-2.pdf]

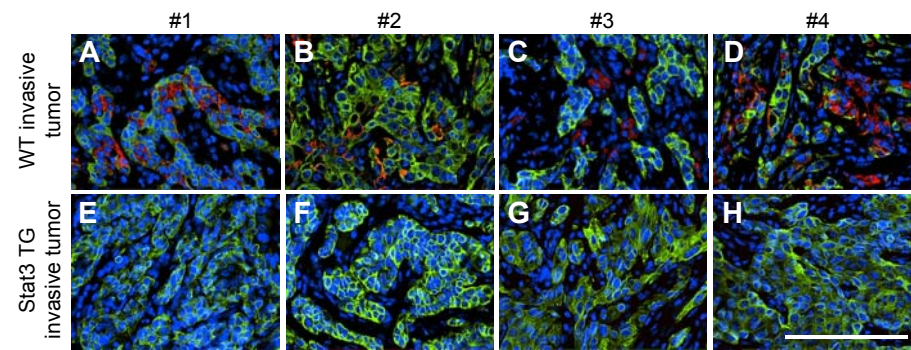

CAN-11-3195R  
Supplementary Figure 3

Supplement: NIHMS375279-supplement-3.pdf [file NIHMS375279-supplement-3.pdf]

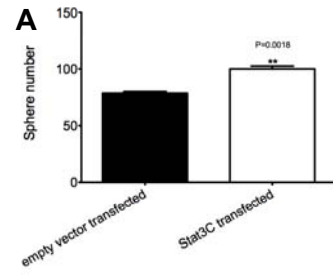

Passage 1

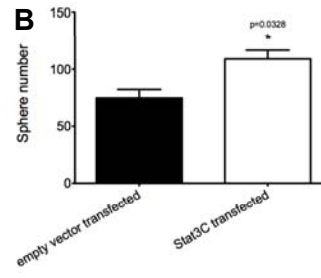

Passage 2

Supplement: NIHMS375279-supplement-4.pdf [file NIHMS375279-supplement-4.pdf]
